# Supplementary material for: A Natural product-based composite nanozyme synergistically induces ferroptosis for lung cancer therapy
Source: Royal Society of Chemistry journal article supplement (doi:10.1039/d6ra00383d), 2026-05-26
Supplement: d6ra00383d1.pdf [file d6ra00383d1.pdf]

## 1 Supplementary Figure

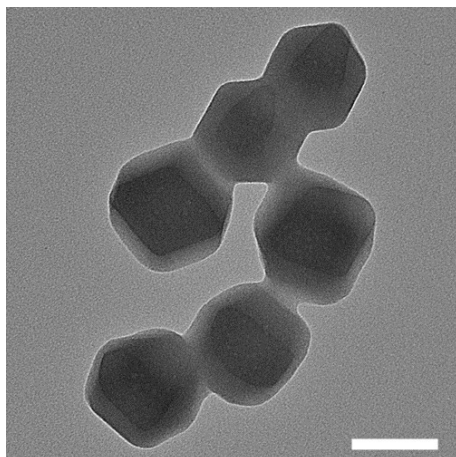

**Supplementary Figure S1.** TEM image of the ZIF-8. Scale bar: 100 nm.

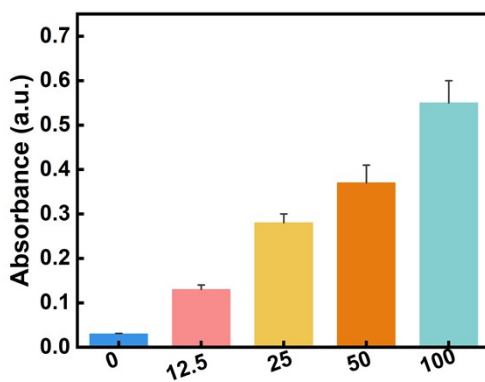

**Supplementary Figure S2.** UV-Vis spectra of different concentrations of Fe@Arc treated with TMB plus H<sub>2</sub>O<sub>2</sub>.

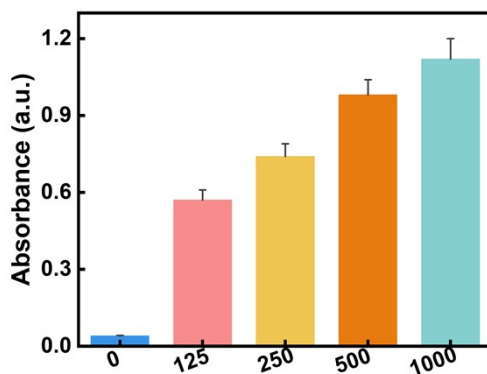

**Supplementary Figure S3.** UV-Vis spectra of different concentrations of H<sub>2</sub>O<sub>2</sub> treated with TMB plus Fe@Arc.

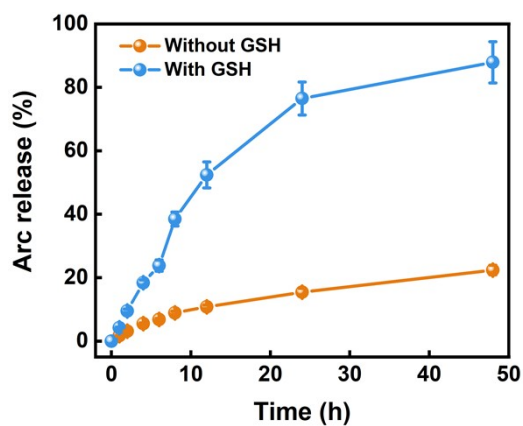

**Supplementary Figure S4.** The Arc release curves in the presence of GSH.

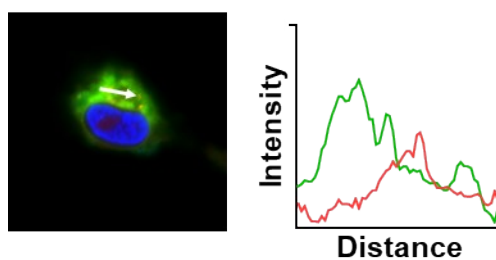

**Supplementary Figure S5.** Lysosomal colocalization analysis of A549 cells.

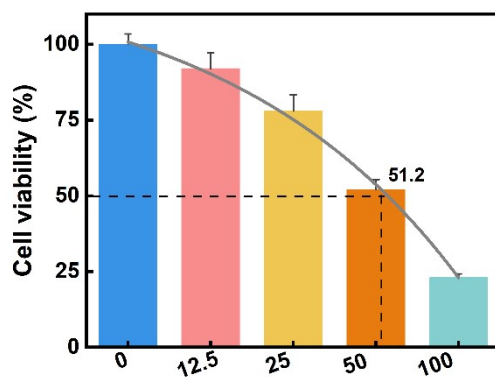

**Supplementary Figure S6.** The cell viability and IC<sub>50</sub> of Arctigenin.

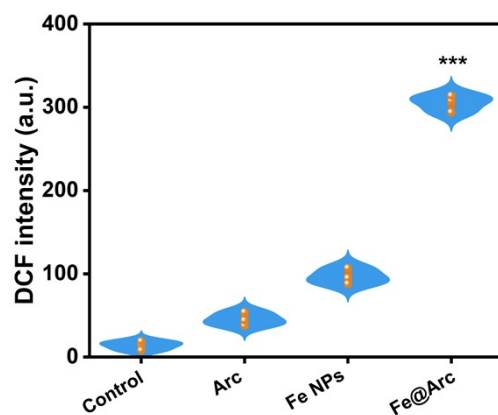

**Supplementary Figure S7.** Quantitative analysis of cell death rate based on confocal image's results.

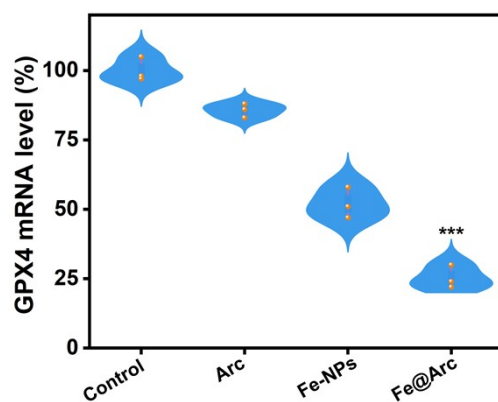

**Supplementary Figure S8.** The GPX4 mRNA level of cancer cells following varying treatments.

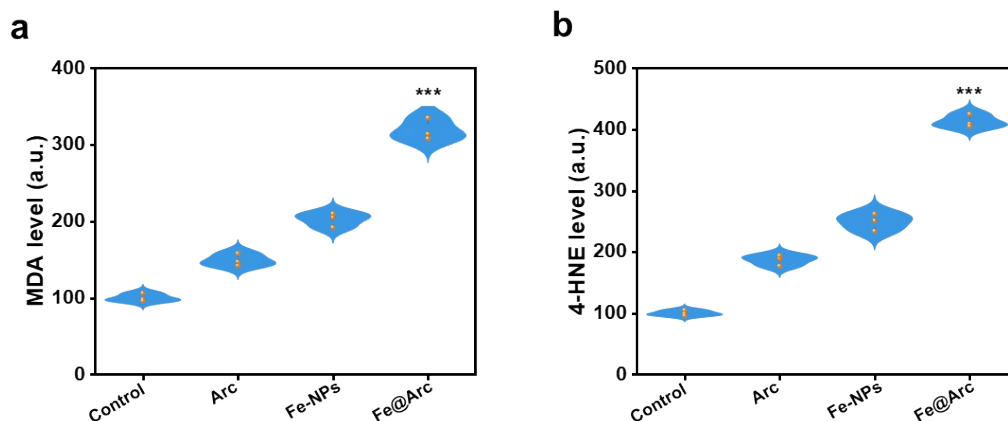

**Supplementary Figure S9.** (a) MDA and (b) 4-HNE levels in tumor cells following various treatments.

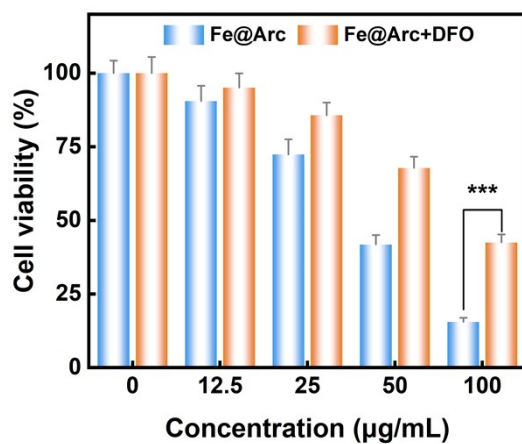

**Supplementary Figure S10.** The cell viability of Fe@Arc in the presence of DFO. The data are presented as mean  $\pm$  SEM (n=5). (\*\*\*)  $p < 0.001$
